# Supplementary material
Source: MDPI journal article supplement (https://www.mdpi.com/2073-4433/11/4/391)
Supplement: s1 [file s1]

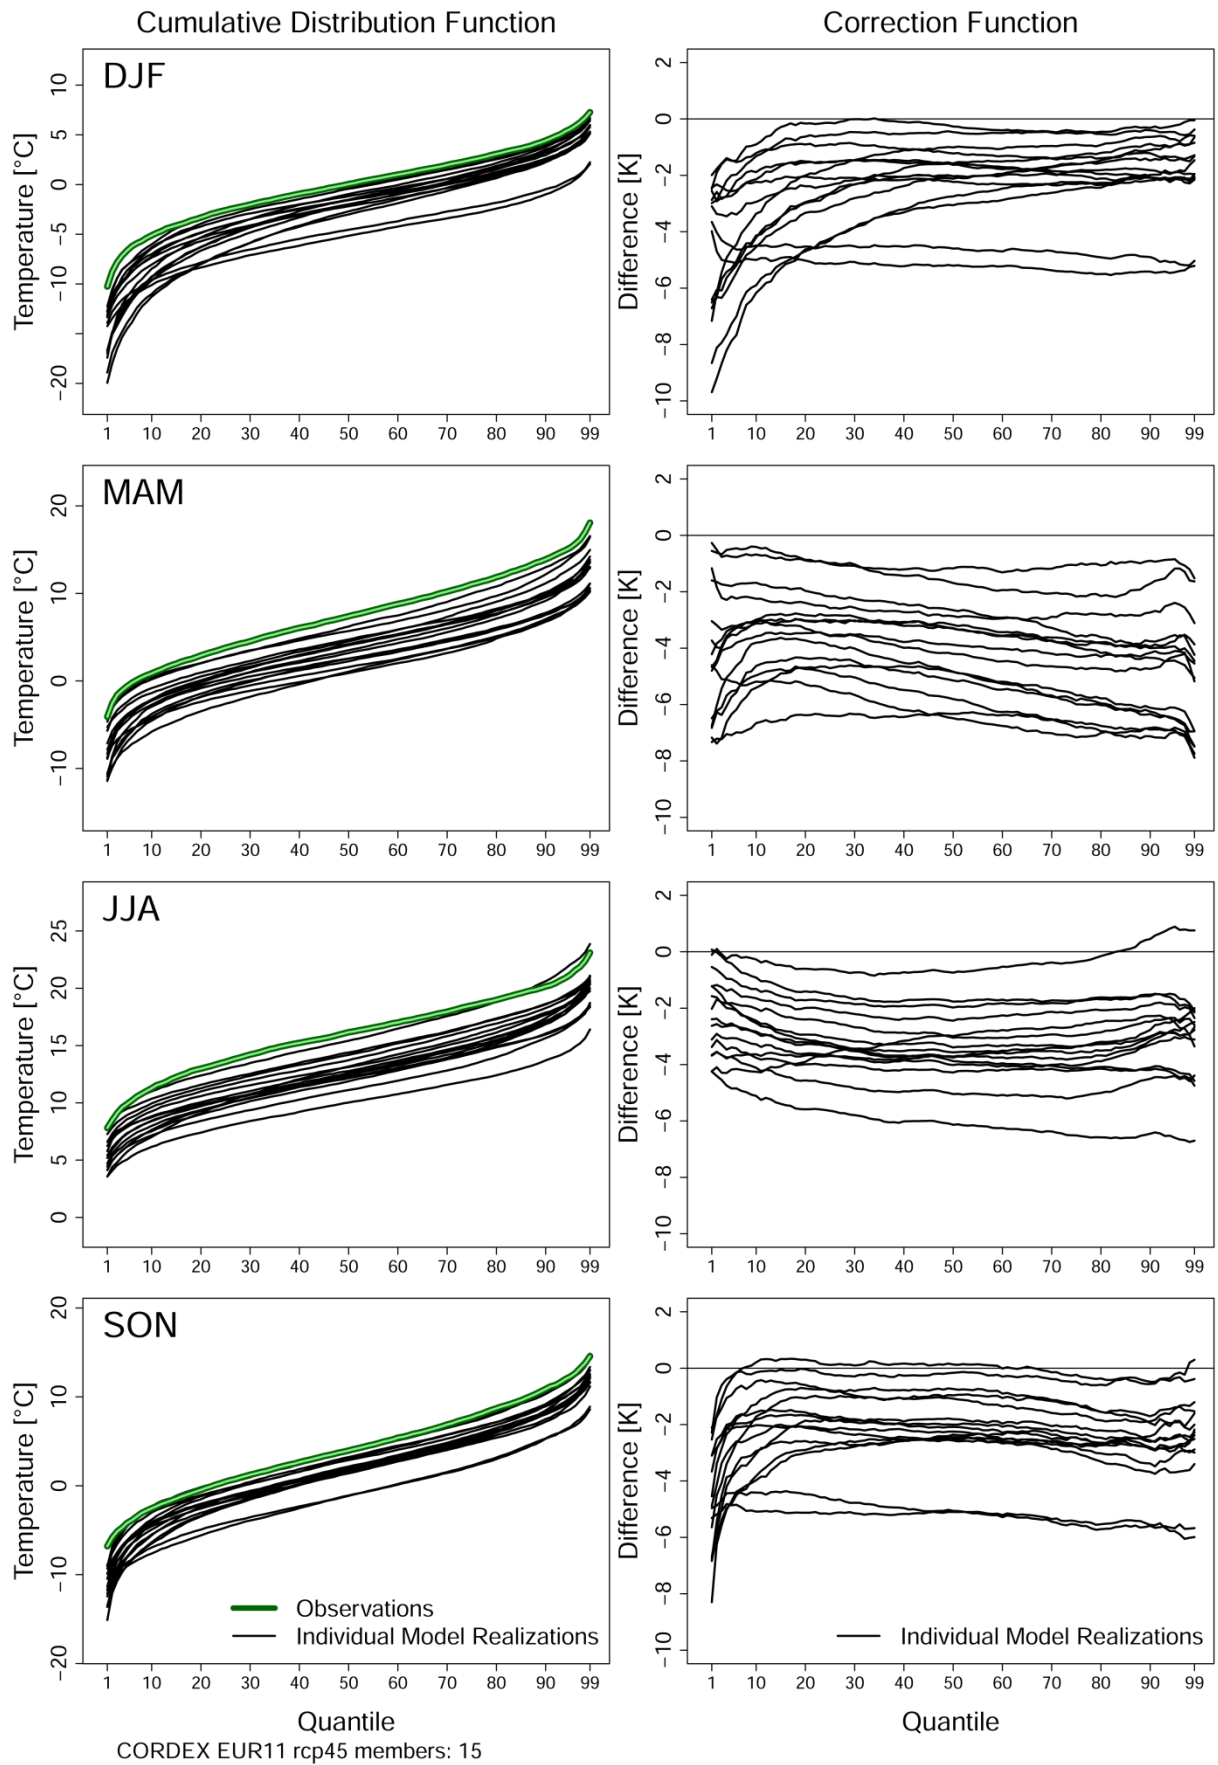

**Figure S1** Cumulative distributions of daily mean temperature (left) and correction functions (right) for 15 climate models' simulations – an example for the low concentration RCP4.5 scenario

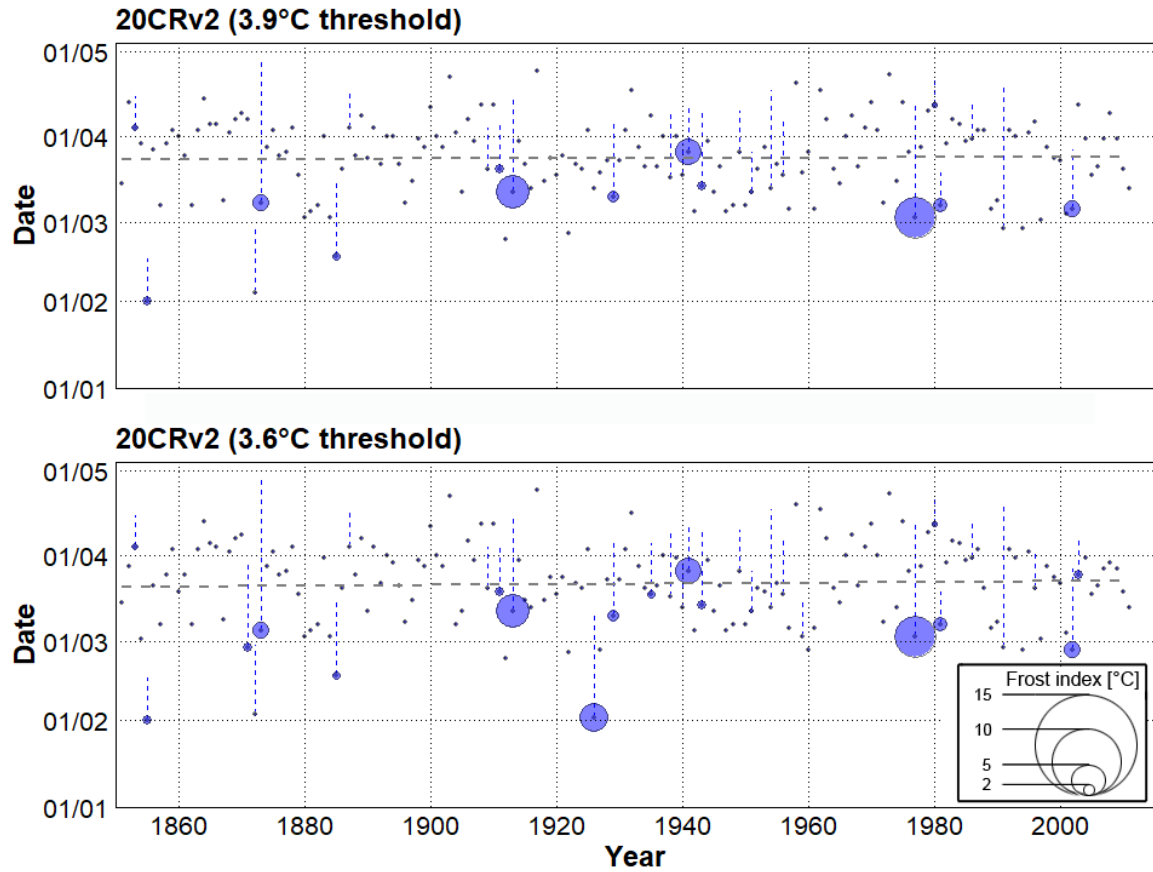

**Figure S2** Interannual variability in starts of spring (grey dots) with their least-squares trends (grey dashed lines), calculated for the bias-corrected 20th Century Reanalysis (version 2c) using two different thresholds. Blue circles highlight springs with frost event(s) and their size indicates the value of frost index. Blue dashed lines represent periods between a start of spring and a last frost event.
